# Supplementary material for: Identification and validation of a ferroptosis-related gene signature predictive of prognosis in breast cancer
Source: PubMed Central journal article supplement (PMC8457571; doi:10.18632/aging.203472), 2021-09-09
Supplement: aging-13-203472-s001.pdf [file aging-13-203472-s001.pdf]

**SUPPLEMENTARY FIGURE**

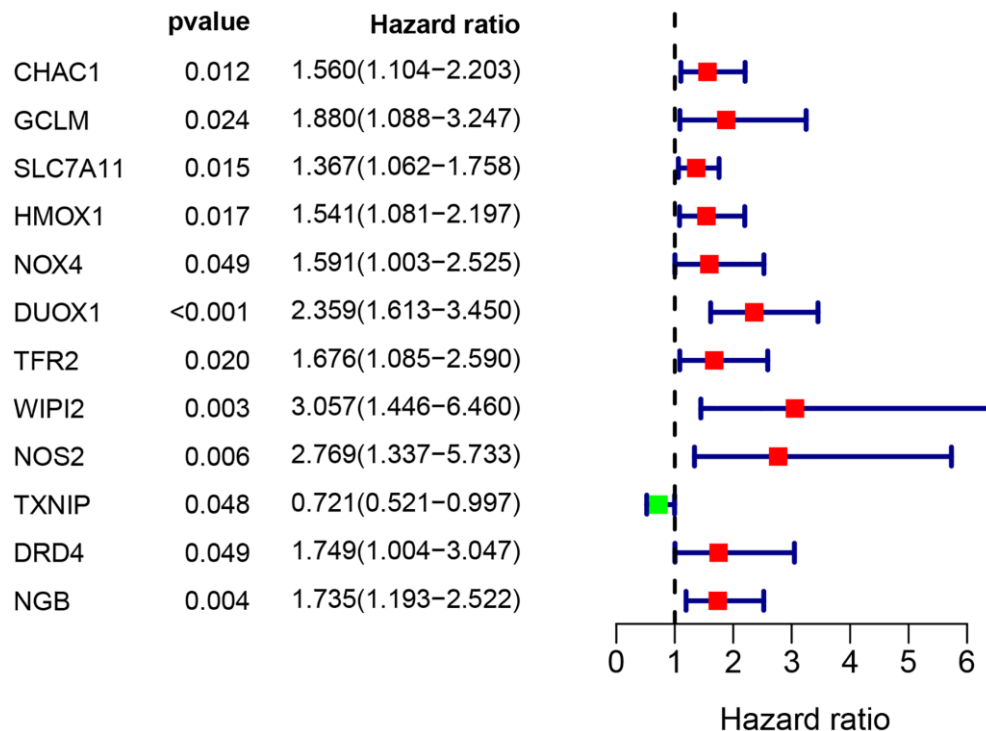

**Supplementary Figure 1. Forest plot of 12 candidate prognosis-related FRGs selected by univariate Cox regression analysis.**
